# Supplementary material for: A fabric-based superhydrophobic ACNTs/Cu/PDMS heater with an excellent electrothermal effect and deicing performance
Source: Royal Society of Chemistry journal article supplement (doi:10.1039/d2nj04026c), 2022-01-01
Supplement: d2nj04026c4.pdf [file d2nj04026c4.pdf]

## Fabric-based superhydrophobic ACNTs/Cu/PDMS heater with excellent electrothermal effect and deicing performance

Hua He <sup>a,b</sup> and Zhiguang Guo <sup>\*a,b</sup>

<sup>a</sup> Ministry of Education Key Laboratory for the Green Preparation and Application of Functional Materials, Hubei University, Wuhan, People's Republic of China.

<sup>b</sup> State Key Laboratory of Solid Lubrication, Lanzhou Institute of Chemical Physics, Chinese Academy of Sciences, Lanzhou, People's Republic of China.

\*Corresponding author. Tel: 0086-931-4968105; Fax: 0086-931-8277088. Email address: [zguo@licp.cas.cn](mailto:zguo@licp.cas.cn)

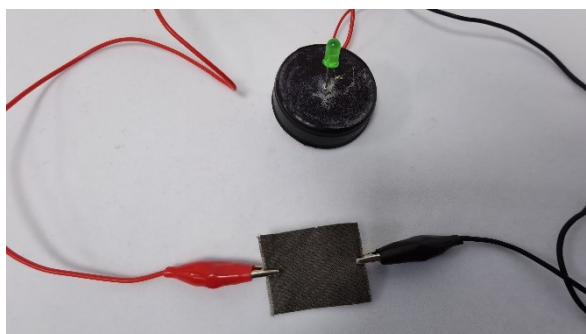

**Fig. S1:** Photos of the PDA/ACNTs fabric connected to light-emitting diode (LED) lights.

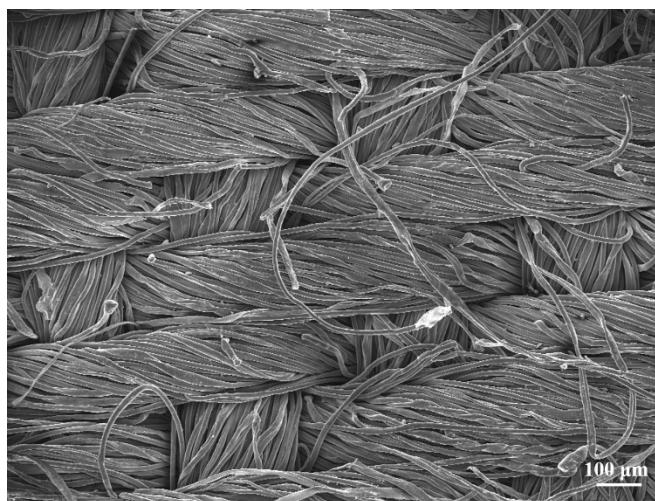

**Fig. S2:** The SEM image of the original fabric magnified 70 times.

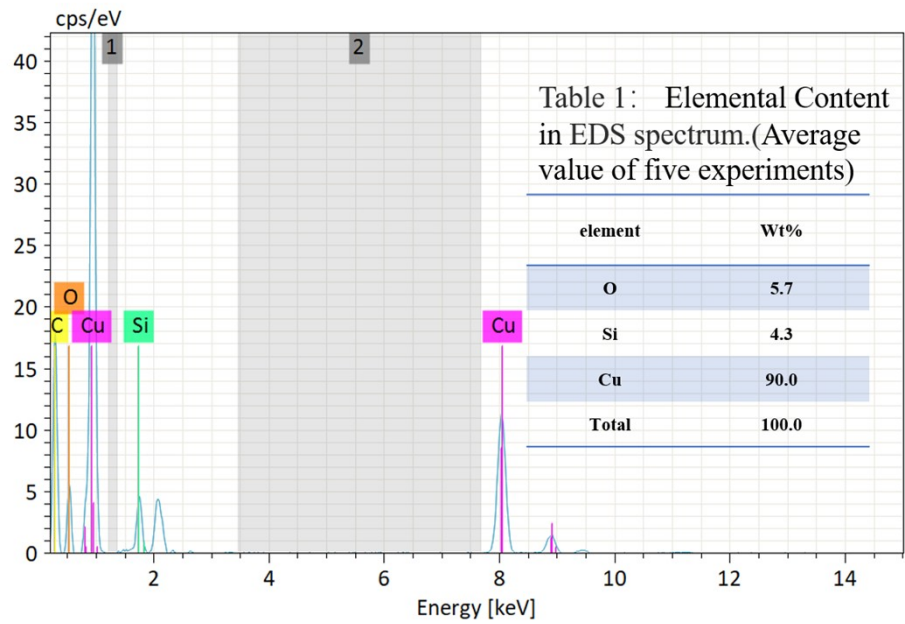

**Fig. S3:** EDS quantitative surface analysis of the PDA/ACNTs/Cu/ PDMS fabric. (Values are the average of five experiments.)

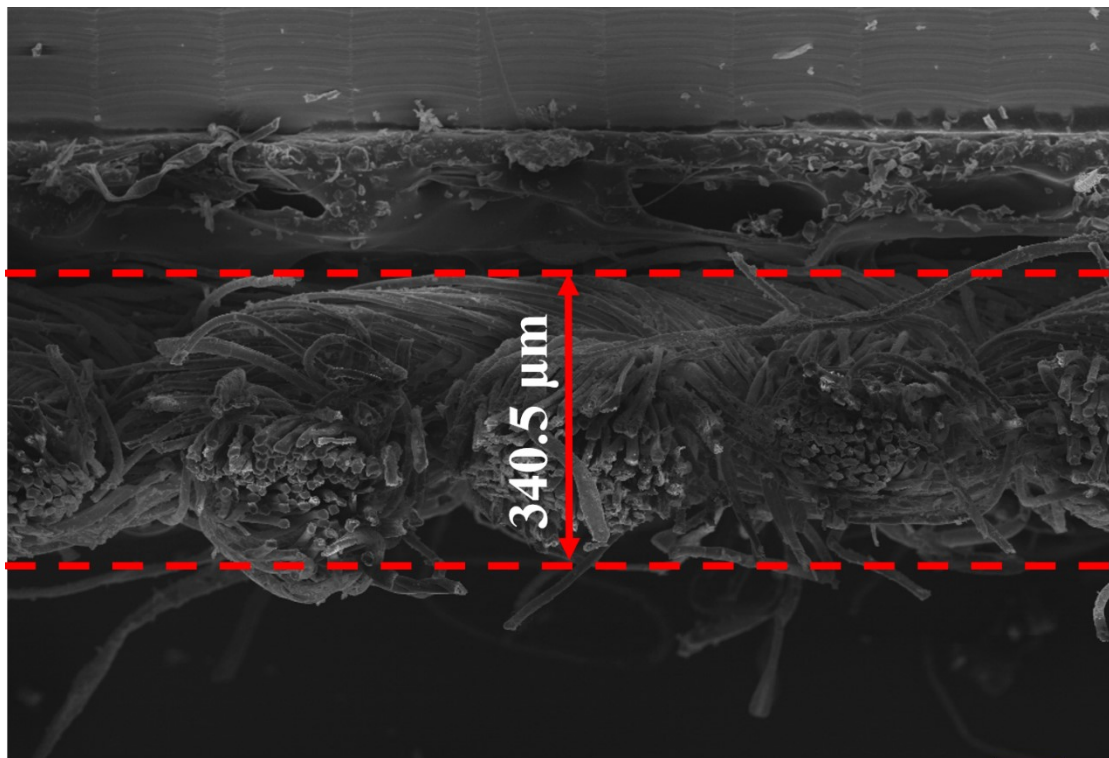

**Fig. S4:** Thickness of the PDA/ACNTs/Cu/ PDMS fabric. (Values are the average of five experiments.)

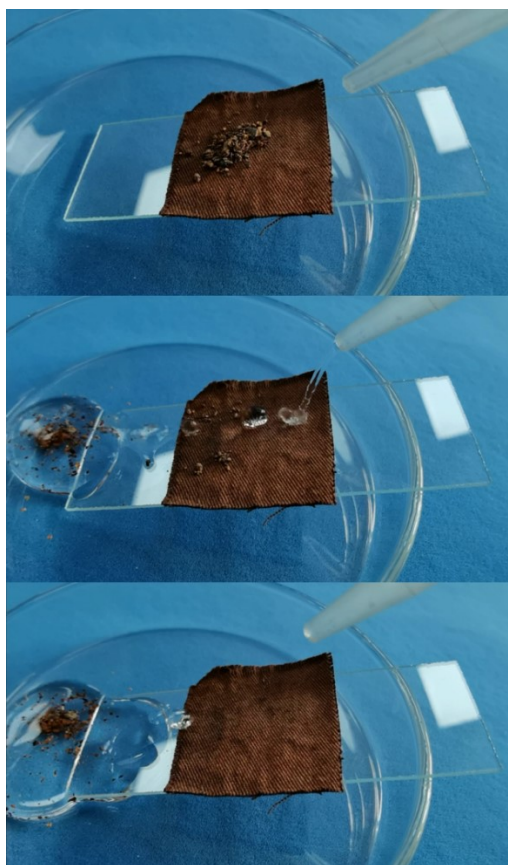

**Fig. S5:** The Self-cleaning ability test of dust particles on the surface of the PDA/ACNTs/Cu/PDMS fabrics.

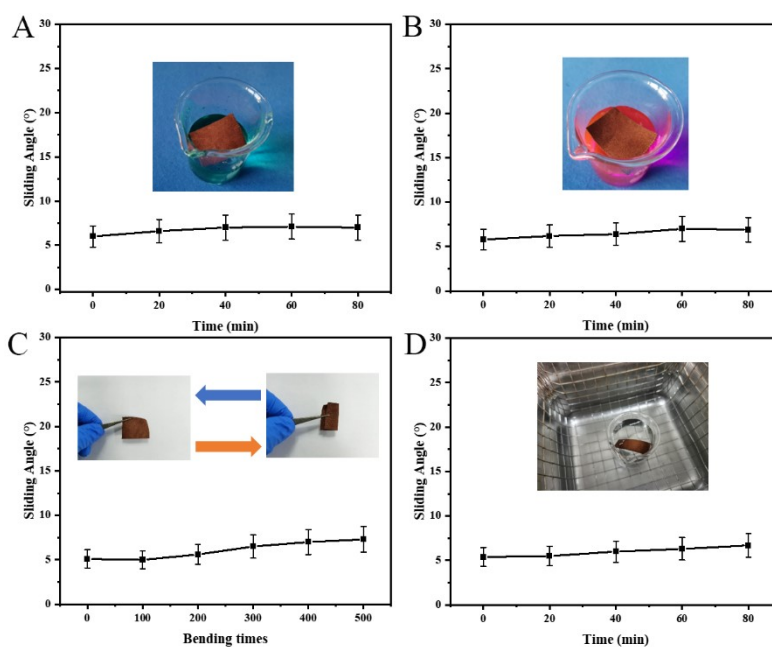

**Fig. S6:** The SAs of the the PDA/ACNT/Cu/PDMS fabric (A) after immersed in an acidsolution of pH=4 for different time; (B) after immersed in an acidsolution of pH=4 for different time; (C)through different times of bending;(d) after different time of ultrasonic treatment. (Values are the average of five experiments.)

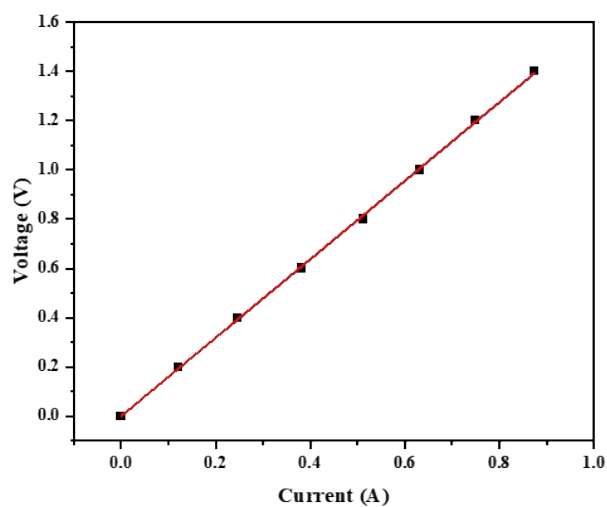

**Fig. S7:** I-V curve of the PDA/ACNT/Cu/PDMS fabric. (Values are the average of five experiments.)

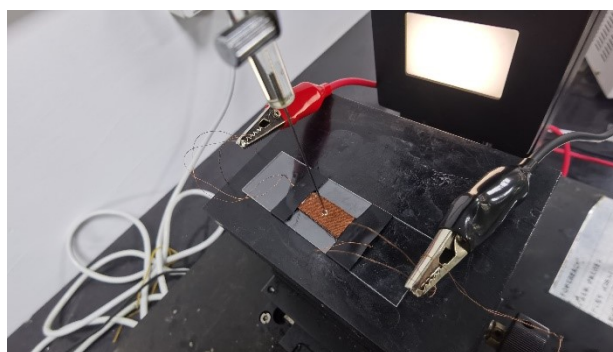

**Fig. S8:** Apply voltage across the PDA/ACNT/Cu/PDMS fabric and observe the changes of water droplets on the surface.

Supplementary video 1: The Self-cleaning ability test of dust particles on the surface of the PDA/ACNTs/Cu/PDMS fabrics.[Supplementary video 1.mp4](#)

Supplementary video 2: A voltage of 1.0V is applied across the PDA/ACNT/Cu/PDMS fabric, and the ice cube changes in real time on the surface.[Supplementary video 2.mp4](#)

Supplementary video 3: At room temperature, the ice cube changes on the PDA/ACNT/Cu/PDMS fabric.[Supplementary video 3.mp4](#)
